# Supplementary material
Source: publisher site journal article supplement (https://www.dovepress.com/article/431955)
Supplement: Supplementary file 1 [file get_supplementary_file.php]

Table S1. Judgment matrix labeling and its meaning

| Aij | Importance of factor i versus factor j | Remarks |
| --- | --- | --- |
| 9 | Factor i is extremely more important than factor j | 8, 6, 4, 2, 1/2, 1/4, 1/6, 1/8 indicate their relative importance in the middle of the two adjacent values on the left |
| 7 | Factor i is very important than factor j |
| 5 | Factor i is more important than factor j |
| 3 | Factor i is slightly more important than factor j |
| 1 | Factor i is as important as factor j |
| 1/3 | Factor j is slightly more important than factor i |
| 1/5 | The j-factor is more important than the i-factor |
| 1/7 | The j-factor is very important than the i-factor |
| 1/9 | The j-factor is extremely more important than the i-factor |

Table S2. Maximum eigenroot and weight vector calculation steps

|  | Calculation steps | Calculation formula |
| --- | --- | --- |
| 1 | Calculate the product of each row of the matrix |  |
| 2 | Calculate the root of |  |
| 3 | Normalize the vector |  |
| 4 | Calculate the maximum characteristic root of the judgment matrix |  |

Note: After calculating the maximum characteristic root, it is necessary to apply the consistency index (CI), random consistency index (RI) and consistency ratio (CR) to do the consistency test, through the consistency test of the judgment matrix, the reasonableness of the conclusions of the hierarchical analysis method can be verified. The judgment consistency formula is:

Table S3. Judgment matrix of indicators for one of the experts as an example

| Projects | Scoring of each educational program | | | | Weighting factor | Consistency check |
| --- | --- | --- | --- | --- | --- | --- |
| A | B | C | D |
| A | 1 | 1/2 | 2 | 2 | 0.2627 | R.I=0.89  C.I=0.0035  =4.0104  CR=0.0039 |
| B | 2 | 1 | 3 | 3 | 0.4550 |
| C | 1/2 | 1/3 | 1 | 1 | 0.1411 |
| D | 1/2 | 1/3 | 1 | 1 | 0.1411 |

Note: The scoring matrix CR < 0.1 passed the consistency test.
